# circKIF4A sponges miR-127 to promote ovarian cancer progression

Shunliang Sheng<sup>1</sup>, Yi Hu<sup>1</sup>, Furong Yu<sup>1</sup>, Wenjuan Tong<sup>1</sup>, Shufen Wang<sup>1</sup>, Yanlin Cai<sup>1</sup>, Jiayu Zhu<sup>2</sup>

<sup>1</sup>Department of Gynaecology and Obstetrics, The First Affiliated Hospital of University of South China, Hengyang, Hunan, China

<sup>2</sup>Department of Obstetrics and Gynecology, Nanfang Hospital of Southern Medical University, Guangzhou, Guangdong, China

**Correspondence to:** Jiayu Zhu, Yanlin Cai; **email:** [stella22@smu.edu.cn](mailto:stella22@smu.edu.cn), [2005001919@usc.edu.cn](mailto:2005001919@usc.edu.cn)

**Keywords:** ovarian cancer, circKIF4A, ceRNA, miR-127, JAM3

**Received:** November 26, 2019 **Accepted:** May 1, 2020

**Published:** August 5, 2020

**Copyright:** © 2020 Sheng et al. This is an open access article distributed under the terms of the [Creative Commons Attribution License](https://creativecommons.org/licenses/by/3.0/) (CC BY 3.0), which permits unrestricted use, distribution, and reproduction in any medium, provided the original author and source are credited.

## ABSTRACT

Ovarian cancer is a major gynecologic cancer and common cause of gynecologic cancer death worldwide. However, the molecular mechanisms of ovarian cancer progression are still unclear. circular RNAs (circRNAs) are recently reported to be involved in cancer progression regulation but the potential functions of circRNAs in ovarian cancer remains unknown. In this study, we explored the expression of circKIF4A in ovarian cancer tissues. Then, a series of experiments were conducted to investigate how circKIF4A functioned in ovarian cancer *in vitro* and *in vivo*. The results revealed that circKIF4A was highly expressed in ovarian cancer tissues. Knockdown of circKIF4A suppressed cell proliferation and migration in ovarian cancer. Subsequent mechanism study revealed that circKIF4A acted as a competitive endogenous RNA (ceRNA) to promoted ovarian cancer progression by sponging miR-127 and upregulated the expression of Junctional adhesion molecule 3 (JAM3). Therefore, circKIF4A could be a novel biomarker and therapeutic target for ovarian cancer.

## INTRODUCTION

Ovarian cancer is one of the major gynecologic cancers and common cause of gynecologic cancer death worldwide [1]. In 2018, there are 295,414 new cases and 184,799 death of ovarian cancer around the world [2]. To date, the prognosis of ovarian cancer is still poor. Exploring the molecular mechanisms of ovarian cancer progression and developing novel strategies are needed.

Recently, it has been reported that circular RNAs (circRNAs) are involved in cancer progression regulation [3], such as in breast cancer [4] and in prostate cancer [5]. circRNAs could also act as biomarkers to help cancer diagnosis and predict prognosis [6]. However, the potential functions of circRNAs in ovarian cancer remains unknown. Moreover, plenty of studies have indicated that circRNAs regulate gene expression by sponging microRNAs and act as competitive endogenous RNAs

(ceRNAs) [7]. In triple-negative breast cancer, circKIF4A acts as a ceRNA for KIF4A via sponging miR-375 to promote cancer progression [8]. But how does circKIF4A function in ovarian cancer is still unclear.

In this study, we explored the expression of circKIF4A in ovarian cancer tissues. Then, a series of experiments were conducted to investigate how circKIF4A functioned in ovarian cancer *in vitro* and *in vivo*. The results revealed that circKIF4A was highly expressed in ovarian cancer tissues. Knockdown of circKIF4A suppressed cell proliferation and migration in ovarian cancer. Subsequent mechanism study revealed that circKIF4A promoted ovarian cancer progression by sponging miR-127 and upregulated the expression of Junctional adhesion molecule 3 (JAM3). miR-127 has been reported as a tumor-suppressor and a potential diagnostic biomarker for multiple cancers [9–11], while JAM3 has been reported to promote tumor growth and aggressiveness of ovarian cancer [12]. Therefore,

circKIF4A could be a novel biomarker and therapeutic target for ovarian cancer.

## RESULTS

### Knockdown of circKIF4A inhibits ovarian cancer proliferation and invasion *in vitro*

To explore the expression profile of circKIF4A in ovarian cancer, we collected 50 pair of ovarian cancer tissues and adjacent normal tissues and performed qRT-PCR. We found that circKIF4A was significantly upregulated in ovarian cancer tissues (Figure 1A). To explore the function of circKIF4A in ovarian cancer, we used siRNA to knock down the expression of circKIF4A (Figure 1B). CCK-8 assay revealed that circKIF4A knockdown significantly inhibited cell proliferation (Figure 1C). BrDU assay also showed that circKIF4A knockdown reduced proliferation ability of ovarian cancer cells (Figure 1D). Transwell assay showed that cell invasion was significantly suppressed after downregulation of circKIF4A (Figure 1E).

### Knockdown of circKIF4A inhibits ovarian cancer growth and metastasis *in vivo*

To further explore the function of circKIF4A in ovarian cancer *in vivo*, mouse xenograft models were established. circKIF4A inhibition significantly decreased xenograft tumor growth (Figure 2A and 2B)

and the expression intensity of Ki-67 in cancer cell (Figure 2C). Lung metastasis was also suppressed by circKIF4A knockdown (Figure 2D), indicating that the knockdown of circKIF4A inhibits ovarian cancer growth and metastasis *in vivo*.

### circKIF4A acts as a sponge for miR-127

We confirmed the intracellular location of circKIF4A and found it mainly localized in cytoplasm (Figure 3A). Then, we used Circular RNA Interactome (<https://circinteractome.nia.nih.gov/index.html>) to predict the potential circRNA/miRNA interaction. We found binding sites for miR-127 in circKIF4A sequence (Figure 3B). Luciferase reporter assay revealed that the luciferase intensity decreased after co-transfection of wild type luciferase reporter and miR-127 mimics, while the mutated luciferase reporter had no such effect (Figure 3C). To confirm the direct binding of circKIF4A and miR-127, RIP assay was performed and we found miR-127 predominantly enriched in MS2bs-circKIF4A group (Figure 3D), indicating that circKIF4A directly interacts with miR-127 and could act as a sponge for miR-127.

### circKIF4A acts as a ceRNA to regulate JAM3

To explore whether circKIF4A sponges miR-127 to regulate the expression of its downstream target, we searched TargetScan for target genes of miR-127 and

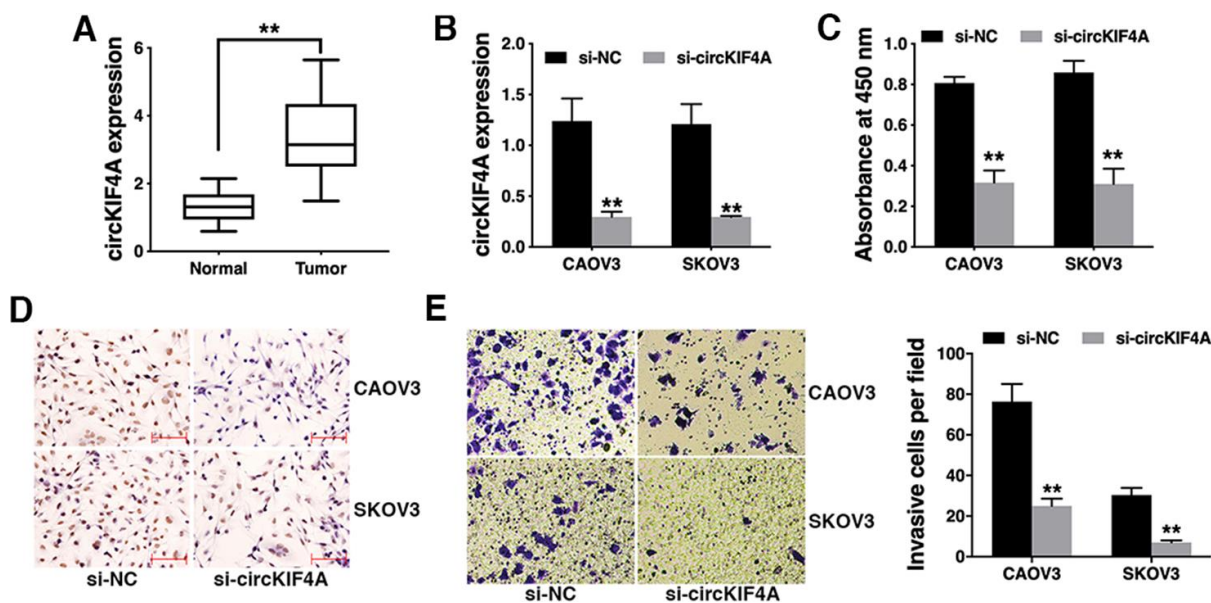

**Figure 1. Knockdown of circKIF4A inhibits ovarian cancer proliferation and invasion *in vitro*.** (A) The expression of circKIF4A in ovarian cancer tissues (Tumor) and normal adjacent tissues (Normal). (B) circKIF4A was successfully knocked down by siRNA. (C) CCK-8 assay was performed to detect cell proliferation. (D) BrDU immunostaining of ovarian cancer cells transfected with si-NC or si-circKIF4A. (E) Transwell assay was performed to assess cell invasive ability (left) and the number of invasive cells was quantified by ImageJ (right). \*\* $P < 0.01$

JAM3 was predicted (Figure 4A). Luciferase reporter assay showed decreased luciferase intensity after co-transfection of miR-127 mimics and wild type luciferase reporter (Figure 4B). Moreover, co-transfection of wild type luciferase reporter and miR-127 inhibitor increased luciferase intensity (Figure 4B). And miR-127 suppressed JAM3 expression, while miR-127 inhibitor increased JAM3 expression (Figure 4C),

indicating that JAM3 is a downstream target of miR-127 and is regulated by miR-127.

RIP assay on Ago2 further revealed that circKIF4A, JAM3 and miR-127 were mainly enriched to Ago2 (Figure 4D), indicating that circKIF4A and JAM3 are recruited to an Ago2-related RISC where they interact with miR-127. In addition, knockdown of circKIF4A

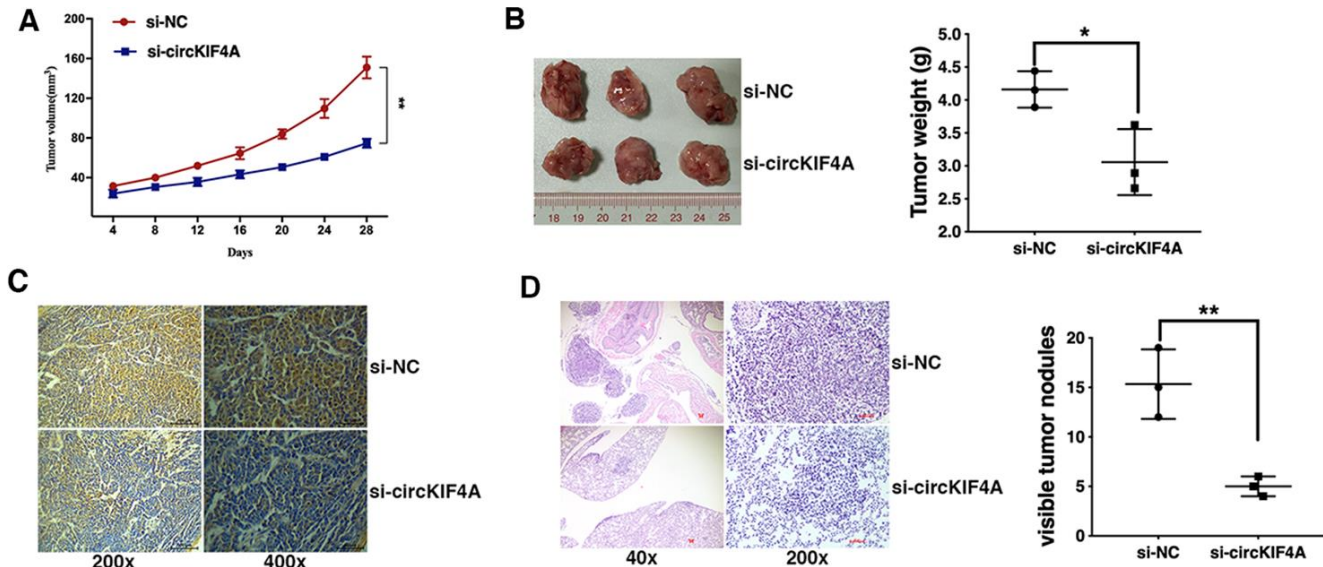

**Figure 2. Knockdown of circKIF4A inhibits ovarian cancer growth and metastasis *in vivo*.** (A) The growth curves of tumors were shown. (B) Representative images of xenograft tumors (left) and the tumor weight was summarized (right). (C) IHC staining of Ki-67 in ovarian cancer cells transfected with si-NC or si-circKIF4A. (D) Representative images of lung metastatic nodules on HE-stained sections (left) and the number of metastatic nodules was quantified (right). \* $P < 0.05$ , \*\* $P < 0.01$

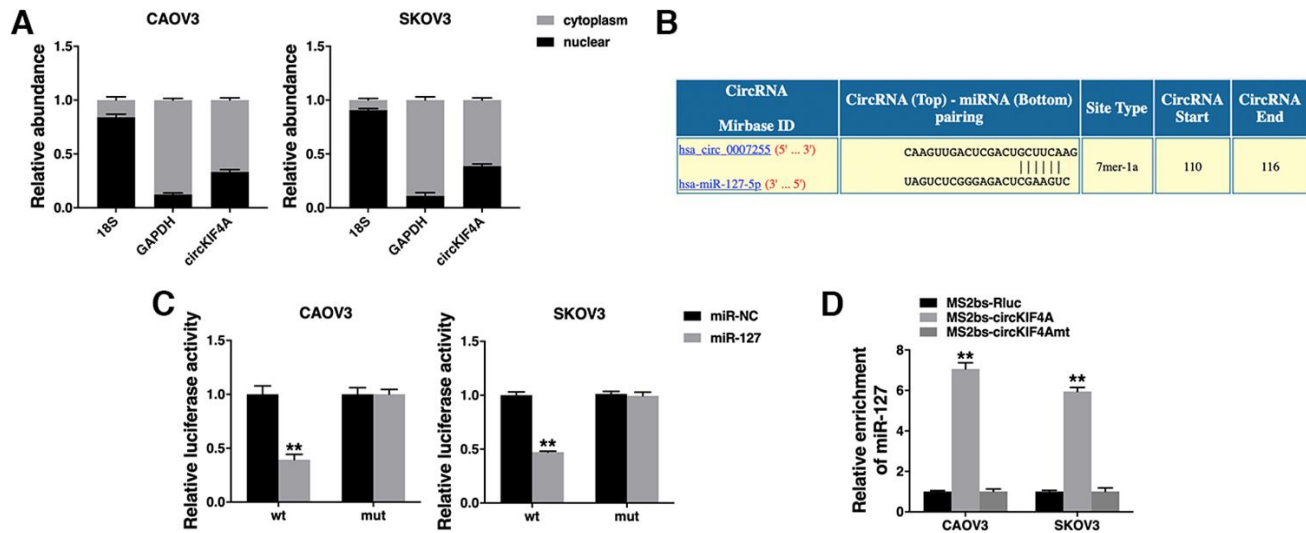

**Figure 3. circKIF4A acts as a sponge for miR-127.** (A) The expression levels of nuclear control (18S), cytoplasmic control (GAPDH) and circKIF4A were detected. (B) The predicted binding sites of miR-127 within the circKIF4A sequence. (C) Luciferase assay of cells co-transfected with miR-127 mimics and wild type or mutant luciferase reporter. (D) MS2-based RIP assay transfected with MS2bs-circKIF4A, MS2bs-circKIF4Amt or control. \*\* $P < 0.01$ .



specificity need to be identified. In the further study, we intend to expand the sample size to explore the relationship between circKIF4A expression and prognosis and clinicopathological features of ovarian cancer to discuss the potential role of circKIF4A as a tumor biomarker in ovarian cancer diagnosis and treatment.

Recently, circRNAs have been reported to function as miRNA sponges [17, 18]. In hepatocellular carcinoma, circMTO1 acts as a sponge for miR-9 to suppress cancer progression [19]. In lung cancer, circTP63 functions as a ceRNA to upregulate FOXM1 expression and promote cancer progression [20]. Here, we showed that circKIF4A could directly interact with miR-127 and act as a sponge for miR-127.

miRNAs are a class of small regulatory RNAs which are associated with tumorigenesis and modulate a variety of biological processes, including cellular differentiation, apoptosis, metabolism, and proliferation. miR-127 has been reported as a tumor-suppressor and can serve as a potential diagnostic biomarker for multiple cancers. In hepatocellular carcinoma, miR-127 is downregulated and overexpression of miR-127 can inhibit cell proliferation and tumorigenicity through downregulating Sept7 expression [9]. miR-127 also decreases the phosphorylation of p65 and the expression of downstream targets of the NF- $\kappa$ B signaling pathway, and inhibits the growth and colony formation of hepatocellular carcinoma cells through decreasing BLVRB expression [21]. Overexpression of miR-127 inhibits hepatocellular carcinoma cell migration, invasion and tumor growth through repressing MMP13 expression and diminishing MMP13/TGF $\beta$ -induced cell migration [22]. In gastric cancer, miR-127 is significantly down-regulated and ectopic expression of miR-127 inhibits cell proliferation, cell cycle progression, cell migration and invasion by directly interacting with MAPK4 [10]. In breast cancer, miR-127 is down-regulated and significantly correlated with poorer overall survival [11]. Over-expression of miR-127 inhibits breast cancer cell proliferation, enhances apoptosis, and reduces migration and invasion via targeting BCL6 [23]. However, the role and function of miR-127 in ovarian cancer has not been studied so far. In this study, we found that circKIF4A functioned as a sponge for miR-127 to regulate the expression of JAM3.

JAM3 is the third member of the JAM family, which is a transmembrane protein with significant roles in regulation of cell functions [24]. JAM3 is expressed in most of tumors having potent metastatic properties. The expression of JAM3 promotes metastasis by enhancing both the adhesion of cancer cells to extracellular

matrices and the subsequent invasion [25]. JAM3 is highly enriched in leukemia-initiating cells and play an important role in the maintenance of leukemia-initiating cell stemness through LRP5/PDK1/AKT/GSK3 $\beta$ / $\beta$ -catenin/CCND1 signaling pathways. Knockdown of JAM3 leads to a dramatic decrease in leukemia-initiating cell proliferation [26]. JAM3 promotes cell migration and invasion in melanoma [27] and glioma [28]. In ovarian cancer, JAM3 promotes tumor growth and aggressiveness [12]. Here, we found that circKIF4A sponged miR-127 and up-regulate the expression of JAM3 to promote ovarian cancer progression.

In conclusion, we revealed that circKIF4A was highly expressed in ovarian cancer tissues. Knockdown of circKIF4A suppressed ovarian cancer cell proliferation and migration. circKIF4A up-regulated the expression of JAM3 by sponging miR-127. circKIF4A could be a novel biomarker and therapeutic target for ovarian cancer.

## MATERIALS AND METHODS

### Ethical standards

This study was approved by the Ethics Committee of The First Affiliated Hospital of University of South China and conducted according to the Helsinki Declaration. Informed consents were obtained from all patients. Animal study was approved and conducted according to the Institutional Animal Care and Use Committee (IACUC) of The First Affiliated Hospital of University of South China.

### Clinical samples

50 pair of ovarian cancer tissues (Tumor) who were diagnosed by histopathology and did not receive any chemotherapy and radiation therapy before, and adjacent normal tissues (Normal) were collected from The First Affiliated Hospital of University of South China and immediately stored in RNAlater (Ambion, USA) for qRT-PCR analysis.

### Cell culture and transfection

Ovarian cancer cell lines CAOV3 and SKOV3 were obtained from American Type Culture Collection (USA) and cultured in RPMI-1640 medium supplemented with 10% fetal bovine serum. Cell lines were confirmed free of mycoplasma infection and cell authenticity was verified by DNA fingerprinting.

Cells were transfected with Lipofectamine 2000 (Invitrogen, USA). siRNAs targeting circKIF4A were synthesized by GenePharma (China), the sequences are

presented in Supplementary Table 1. miR-127 mimic and inhibitor were purchased from GeneCopoeia (USA).

### **Quantitative real-time PCR (qRT-PCR)**

Total RNA was isolated by TRIzol (Invitrogen) and the nuclear and cytoplasmic fractions were isolated by NE-PER™ Nuclear and Cytoplasmic Extraction Reagents (Thermo Scientific). qRT-PCR was conducted with SYBR Premix Ex Taq™ (Takara, Japan) and an All-in-One™ miRNA qRT-PCR Detection Kit (GeneCopoeia) using Bio-Rad IQTM5 Multicolor Real-Time PCR Detection System (USA). The primers for qRT-PCR were purchased from Invitrogen (Supplementary Table 1).

### **Cell counting kit-8 (CCK-8) assay**

Cells ( $1 \times 10^3$ ) were seeded and CCK-8 solution (Dojindo Laboratories, Japan) was added. After 2h of incubation at 37°C, the absorbance at 450nm was measured by microtiter plate reader (Bio-Tek EPOCH2, USA).

### **Bromodeoxyuridine (BrDU) assay**

Cell proliferation was also determined by measuring incorporation of the thymidine analogue BrDU into host DNA. Cells ( $1 \times 10^4$ ) were seeded and exposed to an acute pulse of BrDU (10mg/ml) for 2h. Cells were then fixed with cold 4% paraformaldehyde and visualized for the presence of BrDU incorporation by immunocytochemistry, and photographed using standard light microscopy.

### **Transwell assay**

Transwell assays were performed with migration chambers (BD Biosciences, USA). Briefly, cells ( $1 \times 10^4$ ) were seeded and medium with 10% FBS was added to the lower chamber as a chemoattractant. After 24 h, cells were fixed in methanol, stained with 0.1% crystal violet and counted.

### **Mouse xenograft model**

Cells ( $2 \times 10^6$ ) were subcutaneously injected into the dorsal flanks of 4-week-old female BALB/c nude mice (three mice per group to provide a power of 90% for a significance level of 0.05 with a two-tailed t test). Then the mice were intratumorally injected with 40  $\mu$ L si-NC or si-circKIF4A every 4 days. Xenografts were excised under anesthesia after 4 weeks, and the tumor weights were measured.

For lung metastasis studies, cells ( $1 \times 10^5$ ) were injected into the mice tail veins (three mice per group to provide

a power of 90% for a significance level of 0.05 with a two-tailed t test). Then the mice were injected with 40  $\mu$ L si-NC or si-circKIF4A every 4 days. After 8 weeks, the lungs were excised under anesthesia, and the numbers of macroscopically visible lung metastatic nodules were counted and validated by assessment of hematoxylin and eosin (HE)-stained sections by microscopy.

### **Immunohistochemistry (IHC) analysis**

After deparaffinizing and rehydrating, the slides were treated with 90% methanol/3% H<sub>2</sub>O<sub>2</sub> solution for 10 minutes at room temperature to block endogenous peroxidase. Then, the slides were soaked in sodium citrate buffer (10 mM Sodium citrate, 0.05% Tween 20, pH 6.0) under 96°C for 5 min for antigen retrieval. After blocking by BSA, antibody against Ki-67 (dilution 1:400, CST, USA) was used and incubated overnight at 4°C then incubated at room temperature with biotinylated secondary antibody for 10 minutes, and finally HRP-Streptavidin for 10 minutes. After DAB staining, the intensity of Ki-67 staining was imaged.

### **Luciferase reporter assay**

The circKIF4A sequences including the miR-127 binding sites was inserted into the pGL3 luciferase vector (Promega, USA) immediately downstream of luciferase. Mutations in the miR-127 seed-region were conducted with Fast Site-Directed Mutagenesis Kit (TIANGEN, China). The JAM3 3'-UTR including the miR-127 binding sites was inserted into the pGL3 luciferase vector. Mutations in the miR-127 seed-region served as a mutant control.

Cells ( $5 \times 10^3$ ) were seeded and cotransfected with corresponding vectors and miR-127 mimic or miR-127 inhibitor. After 48 h of incubation, luciferase intensity was measured by dual-luciferase reporter assay system (Promega).

### **RNA immunoprecipitation (RIP) assay**

Cells were co-transfected with MS2bs-circKIF4A, MS2bs-circKIF4Amt or MS2bs-Rluc and MS2bp-GFP. After 48 h, RIP was performed with Magna RIP RNA-Binding Protein Immunoprecipitation Kit (Millipore, USA). The RNA complexes were then purified, and the level of miR-127 was quantified.

For the RIP assay for Ago2, RIP was performed with an anti-Ago2 antibody (Millipore). RNAs were then purified, and the levels of circKIF4A, JAM3 and miR-127 were measured.

## Statistical analysis

Statistical analysis was conducted with SPSS 19.0 software. Comparisons between groups were performed using *t* tests. Unless otherwise indicated, data are presented as the mean  $\pm$  S.D. of three independent experiments. *P* < 0.05 was considered statistically significant.

## AUTHOR CONTRIBUTIONS

Shunliang Sheng wrote the manuscript, Yi Hu and Furong Yu performed the experiment and collected data, Wenjuan Tong, Shufen Wang and Shunliang Sheng interpreted the data and performed the analyses, Yanlin Cai and Jiayu Zhu designed the study.

## CONFLICTS OF INTEREST

The authors declare no conflicts of interest.

## FUNDING

This work was supported by funds from the Health Committee of Hunan Province (B2019132).

## REFERENCES

1. Lheureux S, Braunstein M, Oza AM. Epithelial ovarian cancer: Evolution of management in the era of precision medicine. *CA Cancer J Clin.* 2019; 69:280–304. <https://doi.org/10.3322/caac.21559> PMID:31099893
2. Bray F, Ferlay J, Soerjomataram I, Siegel RL, Torre LA, Jemal A. Global cancer statistics 2018: GLOBOCAN estimates of incidence and mortality worldwide for 36 cancers in 185 countries. *CA Cancer J Clin.* 2018; 68:394–424. <https://doi.org/10.3322/caac.21492> PMID:30207593
3. Beermann J, Piccoli MT, Viereck J, Thum T. Non-coding RNAs in development and disease: background, mechanisms, and therapeutic approaches. *Physiol Rev.* 2016; 96:1297–325. <https://doi.org/10.1152/physrev.00041.2015> PMID:27535639
4. Smid M, Wilting SM, Uhr K, Rodríguez-González FG, de Weerd V, Prager-Van der Smissen WJ, van der Vlugt-Daane M, van Galen A, Nik-Zainal S, Butler A, Martin S, Davies HR, Staaf J, et al. The circular RNome of primary breast cancer. *Genome Res.* 2019; 29:356–66. <https://doi.org/10.1101/gr.238121.118> PMID:30692147
5. Hua JT, Chen S, He HH. Landscape of noncoding RNA in prostate cancer. *Trends Genet.* 2019; 35:840–51. <https://doi.org/10.1016/j.tig.2019.08.004> PMID:31623872
6. Arnaiz E, Sole C, Manterola L, Iparraguirre L, Otaegui D, Lawrie CH. CircRNAs and cancer: biomarkers and master regulators. *Semin Cancer Biol.* 2019; 58:90–99. <https://doi.org/10.1016/j.semcancer.2018.12.002> PMID:30550956
7. Chen LL. The biogenesis and emerging roles of circular RNAs. *Nat Rev Mol Cell Biol.* 2016; 17:205–11. <https://doi.org/10.1038/nrm.2015.32> PMID:26908011
8. Tang H, Huang X, Wang J, Yang L, Kong Y, Gao G, Zhang L, Chen ZS, Xie X. circKIF4A acts as a prognostic factor and mediator to regulate the progression of triple-negative breast cancer. *Mol Cancer.* 2019; 18:23. <https://doi.org/10.1186/s12943-019-0946-x> PMID:30744636
9. Zhou J, Lu S, Yang S, Chen H, Shi H, Miao M, Jiao B. MicroRNA-127 post-transcriptionally downregulates Sept7 and suppresses cell growth in hepatocellular carcinoma cells. *Cell Physiol Biochem.* 2014; 33:1537–46. <https://doi.org/10.1159/000358717> PMID:24854842
10. Guo LH, Li H, Wang F, Yu J, He JS. The tumor suppressor roles of miR-433 and miR-127 in gastric cancer. *Int J Mol Sci.* 2013; 14:14171–84. <https://doi.org/10.3390/ijms140714171> PMID:23880861
11. Wang S, Li H, Wang J, Wang D, Yao A, Li Q. Prognostic and biological significance of microRNA-127 expression in human breast cancer. *Dis Markers.* 2014; 2014:401986. <https://doi.org/10.1155/2014/401986> PMID:25477702
12. Leinster DA, Colom B, Whiteford JR, Ennis DP, Lockley M, McNeish IA, Aurrand-Lions M, Chavakis T, Imhof BA, Balkwill FR, Nourshargh S. Endothelial cell junctional adhesion molecule C plays a key role in the development of tumors in a murine model of ovarian cancer. *FASEB J.* 2013; 27:4244–53. <https://doi.org/10.1096/fj.13-230441> PMID:23825230
13. Guarnerio J, Zhang Y, Cheloni G, Panella R, Mae Katon J, Simpson M, Matsumoto A, Papa A, Loretelli C, Petri A, Kauppinen S, Garbutt C, Nielsen GP, et al. Intragenic antagonistic roles of protein and circRNA in tumorigenesis. *Cell Res.* 2019; 29:628–40. <https://doi.org/10.1038/s41422-019-0192-1> PMID:31209250
14. Yang Y, Gao X, Zhang M, Yan S, Sun C, Xiao F, Huang N, Yang X, Zhao K, Zhou H, Huang S, Xie B, Zhang N. Novel

- role of FBXW7 circular RNA in repressing glioma tumorigenesis. *J Natl Cancer Inst.* 2018; 110:304–15.  
<https://doi.org/10.1093/jnci/djx166> PMID:28903484
15. Chen B, Wei W, Huang X, Xie X, Kong Y, Dai D, Yang L, Wang J, Tang H, Xie X. circEPST1 as a Prognostic Marker and Mediator of Triple-Negative Breast Cancer Progression. *Theranostics.* 2018; 8:4003–4015.  
<https://doi.org/10.7150/thno.24106> PMID:30083277
16. Dong X, Men X, Zhang W, Lei P. Advances in tumor markers of ovarian cancer for early diagnosis. *Indian J Cancer.* 2014 (Suppl 3); 51:e72–76.  
<https://doi.org/10.4103/0019-509X.154049> PMID:25818738
17. Kristensen LS, Andersen MS, Stagsted LV, Ebbesen KK, Hansen TB, Kjems J. The biogenesis, biology and characterization of circular RNAs. *Nat Rev Genet.* 2019; 20:675–91.  
<https://doi.org/10.1038/s41576-019-0158-7> PMID:31395983
18. Ye F, Gao G, Zou Y, Zheng S, Zhang L, Ou X, Xie X, Tang H. circFBXW7 inhibits Malignant progression by sponging miR-197-3p and encoding a 185-aa protein in triple-negative breast cancer. *Mol Ther Nucleic Acids.* 2019; 18:88–98.  
<https://doi.org/10.1016/j.omtn.2019.07.023> PMID:31536884
19. Han D, Li J, Wang H, Su X, Hou J, Gu Y, Qian C, Lin Y, Liu X, Huang M, Li N, Zhou W, Yu Y, Cao X. Circular RNA circMTO1 acts as the sponge of microRNA-9 to suppress hepatocellular carcinoma progression. *Hepatology.* 2017; 66:1151–64.  
<https://doi.org/10.1002/hep.29270> PMID:28520103
20. Cheng Z, Yu C, Cui S, Wang H, Jin H, Wang C, Li B, Qin M, Yang C, He J, Zuo Q, Wang S, Liu J, et al. circTP63 functions as a ceRNA to promote lung squamous cell carcinoma progression by upregulating FOXM1. *Nat Commun.* 2019; 10:3200.  
<https://doi.org/10.1038/s41467-019-11162-4> PMID:31324812
21. Huan L, Bao C, Chen D, Li Y, Lian J, Ding J, Huang S, Liang L, He X. MicroRNA-127-5p targets the biliverdin reductase b/nuclear factor- $\kappa$ B pathway to suppress cell growth in hepatocellular carcinoma cells. *Cancer Sci.* 2016; 107:258–66.  
<https://doi.org/10.1111/cas.12869> PMID:26708147
22. Yang Z, Zhang Y, Wang L. A feedback inhibition between miRNA-127 and TGF $\beta$ /c-jun cascade in HCC cell migration via MMP13. *PLoS One.* 2013; 8:e65256.  
<https://doi.org/10.1371/journal.pone.0065256> PMID:23762330
23. Chen J, Wang M, Guo M, Xie Y, Cong YS. miR-127 regulates cell proliferation and senescence by targeting BCL6. *PLoS One.* 2013; 8:e80266.  
<https://doi.org/10.1371/journal.pone.0080266> PMID:24282530
24. Santoso S, Orlova VV, Song K, Sachs UJ, Andrei-Selmer CL, Chavakis T. The homophilic binding of junctional adhesion molecule-C mediates tumor cell-endothelial cell interactions. *J Biol Chem.* 2005; 280:36326–33.  
<https://doi.org/10.1074/jbc.M505059200> PMID:16118203
25. Fuse C, Ishida Y, Hikita T, Asai T, Oku N. Junctional adhesion molecule-C promotes metastatic potential of HT1080 human fibrosarcoma. *J Biol Chem.* 2007; 282:8276–83.  
<https://doi.org/10.1074/jbc.M608836200> PMID:17227766
26. Zhang Y, Xia F, Liu X, Yu Z, Xie L, Liu L, Chen C, Jiang H, Hao X, He X, Zhang F, Gu H, Zhu J, et al. JAM3 maintains leukemia-initiating cell self-renewal through LRP5/AKT/ $\beta$ -catenin/CCND1 signaling. *J Clin Invest.* 2018; 128:1737–51.  
<https://doi.org/10.1172/JCI93198> PMID:29584620
27. Langer HF, Orlova VV, Xie C, Kaul S, Schneider D, Lonsdorf AS, Fahrleitner M, Choi EY, Dutoit V, Pellegrini M, Grossklaus S, Nawroth PP, Baretton G, et al. A novel function of junctional adhesion molecule-C in mediating melanoma cell metastasis. *Cancer Res.* 2011; 71:4096–105.  
<https://doi.org/10.1158/0008-5472.CAN-10-2794> PMID:21593193
28. Tenan M, Aurrand-Lions M, Widmer V, Alimenti A, Burkhardt K, Lazeyras F, Belkouch MC, Hammel P, Walker PR, Duchosal MA, Imhof BA, Dietrich PY. Cooperative expression of junctional adhesion molecule-C and -B supports growth and invasion of glioma. *Glia.* 2010; 58:524–37.  
<https://doi.org/10.1002/glia.20941> PMID:19795504



## SUPPLEMENTARY MATERIAL

### Supplementary Table

Supplementary Table 1. The sequences of siRNAs and primer sequences for qRT-PCR used in this study.

#### The sequences of siRNAs used in this study

| siRNA        | Species | Sequences             |
|--------------|---------|-----------------------|
| si-NC        | Human   | UUCUCCGAACGUGUCACGUTT |
| si-circKIF4A | Human   | GCCUGGAUCUAUAACGUAUTT |

#### Primer sequences for qRT-PCR used in this study

| Construct      | Species | Direction | Sequence (5' - 3')      |
|----------------|---------|-----------|-------------------------|
| circKIF4A      | Human   | Forward   | GAGGTACCCTGCCTGGATCT    |
|                |         | Reverse   | TGGAATCTCTGTAGGGCACA    |
| 18S            | Human   | Forward   | TTAATTCCGATAACGAACGAGA  |
|                |         | Reverse   | CGCTGAGCCAGTCAGTGTAG    |
| $\beta$ -actin | Human   | Forward   | AGCGAGCATCCCCAAAGTT     |
|                |         | Reverse   | GGGCACGAAGGCTCATCATT    |
| GAPDH          | Human   | Forward   | GGAGCGAGATCCCTCCAAAAT   |
|                |         | Reverse   | GGCTGTTGTCATACTTCTCATGG |
| JAM3           | Human   | Forward   | TCCAGCAATCGAACCCAG      |
|                |         | Reverse   | CTTGTCTGCGAATCCGTAATGAT |
