# Supplementary material for: circKIF4A sponges miR-127 to promote ovarian cancer progression
Source: PubMed Central journal article supplement (PMC7585112; doi:10.18632/aging.103389), 2020-08-05
Supplement: aging-12-103389-s001..pdf [file aging-12-103389-s001..pdf]

## SUPPLEMENTARY TABLE

Supplementary Table 1. The sequences of siRNAs and primer sequences for qRT-PCR used in this study.

| <b>The sequences of siRNAs used in this study</b> |                |                       |  |
|---------------------------------------------------|----------------|-----------------------|--|
| <b>siRNA</b>                                      | <b>Species</b> | <b>Sequences</b>      |  |
| si-NC                                             | Human          | UUCUCCGAACGUGUCACGUTT |  |
| si-circKIF4A                                      | Human          | GCCUGGAUCUAUAACGUAUTT |  |

  

| <b>Primer sequences for qRT-PCR used in this study</b> |                |                  |                           |
|--------------------------------------------------------|----------------|------------------|---------------------------|
| <b>Construct</b>                                       | <b>Species</b> | <b>Direction</b> | <b>Sequence (5' - 3')</b> |
| circKIF4A                                              | Human          | Forward          | GAGGTACCCTGCCTGGATCT      |
|                                                        |                | Reverse          | TGGAATCTCTGTAGGGCACA      |
| 18S                                                    | Human          | Forward          | TTAATTCCGATAACGAACGAGA    |
|                                                        |                | Reverse          | CGCTGAGCCAGTCAGTGTAG      |
| $\beta$ -actin                                         | Human          | Forward          | AGCGAGCATCCCCAAAGTT       |
|                                                        |                | Reverse          | GGGCACGAAGGTCATCATT       |
| GAPDH                                                  | Human          | Forward          | GGAGCGAGATCCCTCCAAAAT     |
|                                                        |                | Reverse          | GGCTGTTGTCATACTTCTCATGG   |
| JAM3                                                   | Human          | Forward          | TCCAGCAATCGAACCCAG        |
|                                                        |                | Reverse          | CTTGCTGCGAATCCGTAATGAT    |
